# Supplementary material for: The p38 MAPK/PMK-1 Pathway Is Required for Resistance to Nocardia farcinica Infection in Caenorhabditis elegance
Source: MDPI journal article supplement (doi:10.3390/pathogens11101071), 2022-09-21
Supplement: s1 [file s1]

Lifespan assays data

| Genotype/condition          | Median survival $\pm$ Std. error | P value  | N  | Fig    |
|-----------------------------|----------------------------------|----------|----|--------|
| N <sub>2</sub> +OP50        | 18 $\pm$ 1                       | --       | 58 | Fig1   |
| N <sub>2</sub> +N.farcinica | 18 $\pm$ 0.9                     | 0.2      | 71 | Fig1   |
|                             |                                  |          |    |        |
| WT+OP50                     | 19 $\pm$ 0.5                     | --       | 63 | Fig2.A |
| <i>jnk-1(gk7)</i> +OP50     | 17 $\pm$ 0.9                     | 0.0003   | 74 | Fig2.A |
| WT+NF                       | 18 $\pm$ 0.5                     | --       | 73 | Fig2.A |
| <i>jnk-1(gk7)</i> +NF       | 17 $\pm$ 0.5                     | < 0.0001 | 54 | Fig2.A |
|                             |                                  |          |    |        |
| WT+OP50                     | 19 $\pm$ 0.5                     | --       | 55 | Fig2.B |
| <i>mpk-1(n2521)</i> +OP50   | 18 $\pm$ 0.8                     | 0.0017   | 70 | Fig2.B |
| WT+NF                       | 19 $\pm$ 0.9                     | --       | 58 | Fig2.B |
| <i>mpk-1(n2521)</i> +NF     | 17 $\pm$ 0.8                     | < 0.0001 | 68 | Fig2.B |
|                             |                                  |          |    |        |
| WT+OP50                     | 19 $\pm$ 0.8                     | --       | 50 | Fig2.C |
| <i>hlh-30(tm1978)</i> +OP50 | 17 $\pm$ 0.5                     | <0.0001  | 76 | Fig2.C |
| WT+NF                       | 19 $\pm$ 0.9                     | --       | 57 | Fig2.C |
| <i>hlh-30(tm1978)</i> +NF   | 17 $\pm$ 0.5                     | < 0.0001 | 68 | Fig2.C |
|                             |                                  |          |    |        |
| Vector RNAi+OP50            | 20 $\pm$ 1.24                    | --       | 54 | Fig2.D |
| <i>dkf-2</i> RNAi+ OP50     | 18 $\pm$ 0.8                     | 0.0010   | 45 | Fig2.D |
| Vector RNAi+NF              | 19 $\pm$ 0.4                     | --       | 58 | Fig2.D |
| <i>dkf-2</i> RNAi+ NF       | 17 $\pm$ 0.9                     | < 0.0001 | 44 | Fig2.D |
|                             |                                  |          |    |        |
| Vector RNAi+OP50            | 19 $\pm$ 0.5                     | --       | 56 | Fig2.E |
| <i>fshr-1</i> RNAi+OP50     | 19 $\pm$ 0.9                     | 0.0696   | 56 | Fig2.E |
| Vector RNAi+NF              | 19 $\pm$ 0.8                     | --       | 62 | Fig2.E |
| <i>fshr-1</i> RNAi+NF       | 18 $\pm$ 0.5                     | 0.0094   | 70 | Fig2.E |
|                             |                                  |          |    |        |
| Vector RNAi+OP50            | 20 $\pm$ 0.5                     | --       | 62 | Fig2.F |
| <i>egl-30</i> RNAi+OP50     | 20 $\pm$ 0.9                     | 0.0718   | 43 | Fig2.F |
| Vector RNAi+NF              | 19 $\pm$ 1.4                     | --       | 54 | Fig2.F |
| <i>egl-30</i> RNAi+NF       | 18 $\pm$ 0.8                     | < 0.0001 | 65 | Fig2.F |
|                             |                                  |          |    |        |
| Vector RNAi+OP50            | 19 $\pm$ 0.8                     | --       | 49 | Fig2.G |
| <i>daf-16</i> RNAi+OP50     | 18 $\pm$ 0.4                     | 0.0006   | 61 | Fig2.G |
| Vector RNAi+NF              | 19 $\pm$ 1.2                     | --       | 55 | Fig2.G |
| <i>daf-16</i> RNAi+NF       | 17 $\pm$ 1.2                     | < 0.0001 | 72 | Fig2.G |
|                             |                                  |          |    |        |
| WT+OP50                     | 19 $\pm$ 0.4                     | --       | 63 | Fig2.H |
| <i>pmk-1(km25)</i> +OP50    | 17 $\pm$ 0.9                     | <0.0001  | 69 | Fig2.H |
| WT+NF                       | 18 $\pm$ 1.6                     | --       | 73 | Fig2.H |

|                                        |        |          |    |        |
|----------------------------------------|--------|----------|----|--------|
| pmk-1(km25)+NF                         | 7±0.5  | < 0.0001 | 51 | Fig2.H |
|                                        |        |          |    |        |
| WT+OP50                                | 19±0.5 | --       | 73 | Fig2.I |
| <i>nsy-1(ag3)</i> +OP50                | 17±0.5 | < 0.0001 | 59 | Fig2.I |
| WT+NF                                  | 20±0.8 | --       | 54 | Fig2.I |
| <i>nsy-1(ag3)</i> +NF                  | 8±0.8  | < 0.0001 | 58 | Fig2.I |
|                                        |        |          |    |        |
| WT+OP50                                | 20±0.5 | --       | 69 | Fig2.J |
| <i>sek-1(ag1)</i> +OP50                | 18±0.9 | < 0.0001 | 75 | Fig2.J |
| WT+NF                                  | 20±0.8 | --       | 48 | Fig2.J |
| <i>sek-1(ag1)</i> +NF                  | 7±1.2  | < 0.0001 | 61 | Fig2.J |
|                                        |        |          |    |        |
| WT+OP50                                | 19±1.4 | --       | 63 | Fig5.A |
| WT+NF                                  | 18±0.5 | 0.039    | 73 | Fig5.A |
| <i>skn-1(tm3411)</i> +OP50             | 17±0.9 | --       | 50 | Fig5.A |
| <i>skn-1(tm3411)</i> +NF               | 7±0.9  | < 0.0001 | 59 | Fig5.A |
|                                        |        |          |    |        |
| WT+vector RNAi                         | 18±0.5 | --       | 53 | Fig5.B |
| <i>pmk-1(km25)</i> +vector RNAi        | 7±0.9  | < 0.0001 | 60 | Fig5.B |
| <i>pmk-1(km25)</i> + <i>skn-1</i> RNAi | 6±1.7  | < 0.0001 | 52 | Fig5.B |
