# Supplementary material for: The p38 MAPK/PMK-1 Pathway Is Required for Resistance to Nocardia farcinica Infection in Caenorhabditis elegance
Source: MDPI journal article supplement (doi:10.3390/pathogens11101071), 2022-09-21
Supplement: s1 [file s1]

**Table S2** Primers of QPCR analysis

| Primer                   | Sequence (5' to 3')                             | Source or reference |
|--------------------------|-------------------------------------------------|---------------------|
| Nlp-29-F<br>Nlp-29-R     | TGTTCTTGTCGTCCTTCTCG<br>CCATAGCCTCCATAC ATTCCTC | This study          |
| F08g5.6-F<br>F08g5.6-R   | TGTGGC AAAGGAGAGGATG<br>ACGGTAGATTGCTAATGGGTTC  | This study          |
| F35e12.5-F<br>F35e12.5-R | ACTGTCAGAGCAGCAAATAACG<br>AAAGCGGTGTAATCAGGTCC  | This study          |
| Y37a1a.2-F<br>Y37a1a.2-R | TTCTGTCGTCTGGATTGGC<br>CGAGAGATA ACGGCTTGGTG    | This study          |
| Gst-4-F<br>Gst-4-R       | TTGATGCTCGTGCTCTTGC<br>CAA ATGGAGTCGTTGGCTTC    | This study          |
| Act-1-F<br>Act-1-R       | CCAATCCAAGAGAGGTATCC<br>GGCTTCAGTGAGGAGGAC      | This study          |

*The primers were designed in this study verified by PCR amplification before QPCR assay*
